# Supplementary material for: Development of Optimal Digesting Conditions for Microplastic Analysis in Dried Seaweed Gracilaria fisheri
Source: MDPI journal article supplement (doi:10.3390/foods10092118), 2021-09-08
Supplement: s1 [file s1]

## Supplementary Information

# Development of Optimal Digesting Conditions for Microplastics Analysis in Dried Seaweed *Gracilaria fisheri*

Rizky Prihandari, Weeraya Karnpanit, Suwapat Kittibunchakul and Varongsiri Kemsawasd\*

Institute of Nutrition, Mahidol University, Salaya, Nakhon Pathom, Thailand 73170;  
rizky.pri@mahidol.student.ac.th (R.P.); weeraya.kar@mahidol.ac.th (W.K.);  
suwapat.kit@mahidol.ac.th (S.K.)

\* Corresponding author: varongsiri.kem@mahidol.ac.th(V.K.)

| Initial<br>condition of<br>reference<br>plastic<br>particles | Final condition after digestion process of spiked plastic particles |                                |                                |                     |                       |
|--------------------------------------------------------------|---------------------------------------------------------------------|--------------------------------|--------------------------------|---------------------|-----------------------|
|                                                              | Enzymatic Method                                                    |                                |                                | Oxidative<br>Method | Combination<br>Method |
|                                                              | 1%<br>Cellulase+5%<br>Protease                                      | 3%<br>Cellulase+5%<br>Protease | 5%<br>Cellulase+5%<br>Protease |                     |                       |
| (A)                                                          |                                                                     |                                |                                |                     |                       |
| (B)                                                          |                                                                     |                                |                                |                     |                       |
| (C)                                                          |                                                                     |                                |                                |                     |                       |
| (D)                                                          |                                                                     |                                |                                |                     |                       |
| (E)                                                          |                                                                     |                                |                                |                     |                       |

Figure S1: Microscopic appearance of reference and spiked plastic particles incubated with different digesting conditions

Figure S1: Microscopic appearance of reference and spiked plastic particles incubated with enzymatic, oxidative, and combination methods i.e., polyethylene terephthalate (A), polyethylene (B), polypropylene (C), polystyrene (D), and polyvinyl chloride (E). All plastic particles were observed by using 10x and 40x objectives.
